# Supplementary material
Source: publisher figshare collection journal article supplement (https://gsajournals.figshare.com/articles/dataset/_/13072355)
Supplement: Supplementary file 7 [file 1]

Figure S5

A Muscle

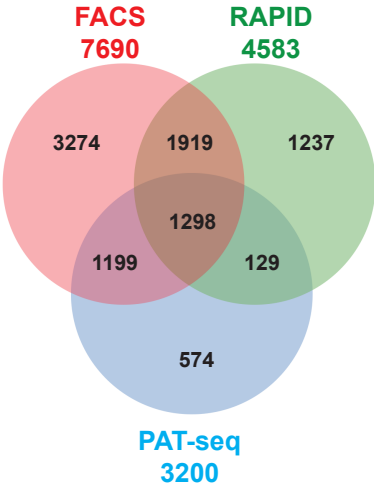

B Muscle (SL1)

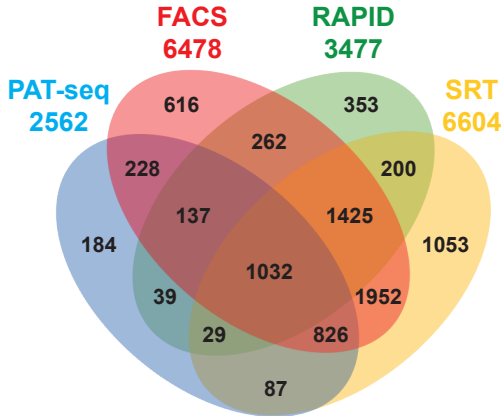

C Intestine

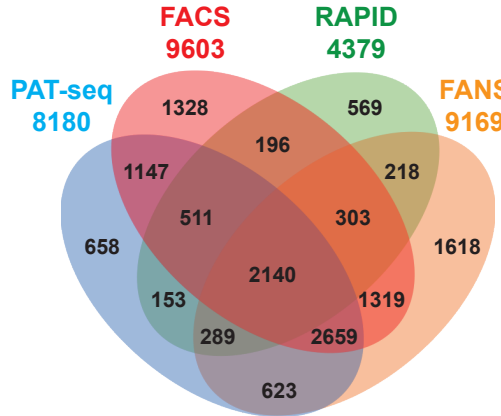

D

| Muscle                     | In common with |          |         |
|----------------------------|----------------|----------|---------|
|                            | RAPID          | FACS-seq | PAT-seq |
| Fraction of RAPID genes    | 100%           | 70%      | 31%     |
| Fraction of FACS-seq genes | 42%            | 100%     | 32%     |
| Fraction of PAT-seq genes  | 45%            | 78%      | 100%    |

| Muscle (SL1)               | In common with |          |         |      |
|----------------------------|----------------|----------|---------|------|
|                            | RAPID          | FACS-seq | PAT-seq | SRT  |
| Fraction of RAPID genes    | 100%           | 82%      | 36%     | 77%  |
| Fraction of FACS-seq genes | 44%            | 100%     | 34%     | 81%  |
| Fraction of PAT-seq genes  | 48%            | 87%      | 100%    | 77%  |
| Fraction of SRT genes      | 41%            | 79%      | 30%     | 100% |

| Intestine                  | In common with |          |         |          |
|----------------------------|----------------|----------|---------|----------|
|                            | RAPID          | FACS-seq | PAT-seq | FANS-seq |
| Fraction of RAPID genes    | 100%           | 72%      | 71%     | 67%      |
| Fraction of FACS-seq genes | 33%            | 100%     | 67%     | 67%      |
| Fraction of PAT-seq genes  | 38%            | 79%      | 100%    | 70%      |
| Fraction of FANS-seq genes | 32%            | 70%      | 62%     | 100%     |

E

| Muscle                     | Cross-method consistency      |                              |                                   |
|----------------------------|-------------------------------|------------------------------|-----------------------------------|
|                            | Not detected by other methods | Detected by one other method | Detected by the two other methods |
| Fraction of RAPID genes    | 27%                           | 45%                          | 28%<br>$\Sigma=73\%$              |
| Fraction of FACS-seq genes | 43%                           | 40%                          | 17%<br>$\Sigma=57\%$              |
| Fraction of PAT-seq genes  | 18%                           | 41%                          | 41%<br>$\Sigma=82\%$              |

| Muscle (SL1)               | Cross-method consistency      |                              |                               |                                     |
|----------------------------|-------------------------------|------------------------------|-------------------------------|-------------------------------------|
|                            | Not detected by other methods | Detected by one other method | Detected by two other methods | Detected by the three other methods |
| Fraction of RAPID genes    | 10%                           | 14%                          | 46%                           | 30%<br>$\Sigma=90\%$                |
| Fraction of FACS-seq genes | 9%                            | 38%                          | 37%                           | 16%<br>$\Sigma=91\%$                |
| Fraction of PAT-seq genes  | 7%                            | 14%                          | 39%                           | 40%<br>$\Sigma=93\%$                |
| Fraction of SRT genes      | 16%                           | 34%                          | 34%                           | 16%<br>$\Sigma=84\%$                |

| Intestine                  | Cross-method consistency      |                              |                               |                                     |
|----------------------------|-------------------------------|------------------------------|-------------------------------|-------------------------------------|
|                            | Not detected by other methods | Detected by one other method | Detected by two other methods | Detected by the three other methods |
| Fraction of RAPID genes    | 13%                           | 13%                          | 25%                           | 49%<br>$\Sigma=87\%$                |
| Fraction of FACS-seq genes | 14%                           | 28%                          | 36%                           | 22%<br>$\Sigma=86\%$                |
| Fraction of PAT-seq genes  | 8%                            | 24%                          | 42%                           | 26%<br>$\Sigma=92\%$                |
| Fraction of FANS-seq genes | 18%                           | 24%                          | 35%                           | 23%<br>$\Sigma=82\%$                |
