# Supplementary material
Source: publisher figshare collection journal article supplement (https://gsajournals.figshare.com/articles/dataset/_/13072355)

**A** RAPID signal at rDNA repeats

Figure S2

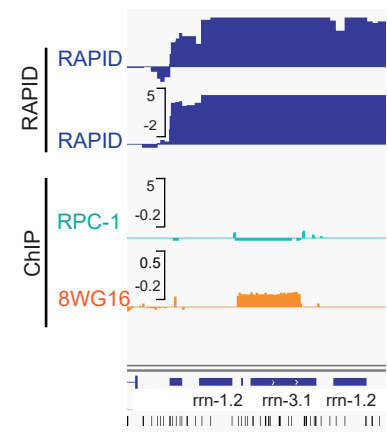

**B** RAPID signal at polIII snoRNA genes; no PolIII overlapping (24/57)

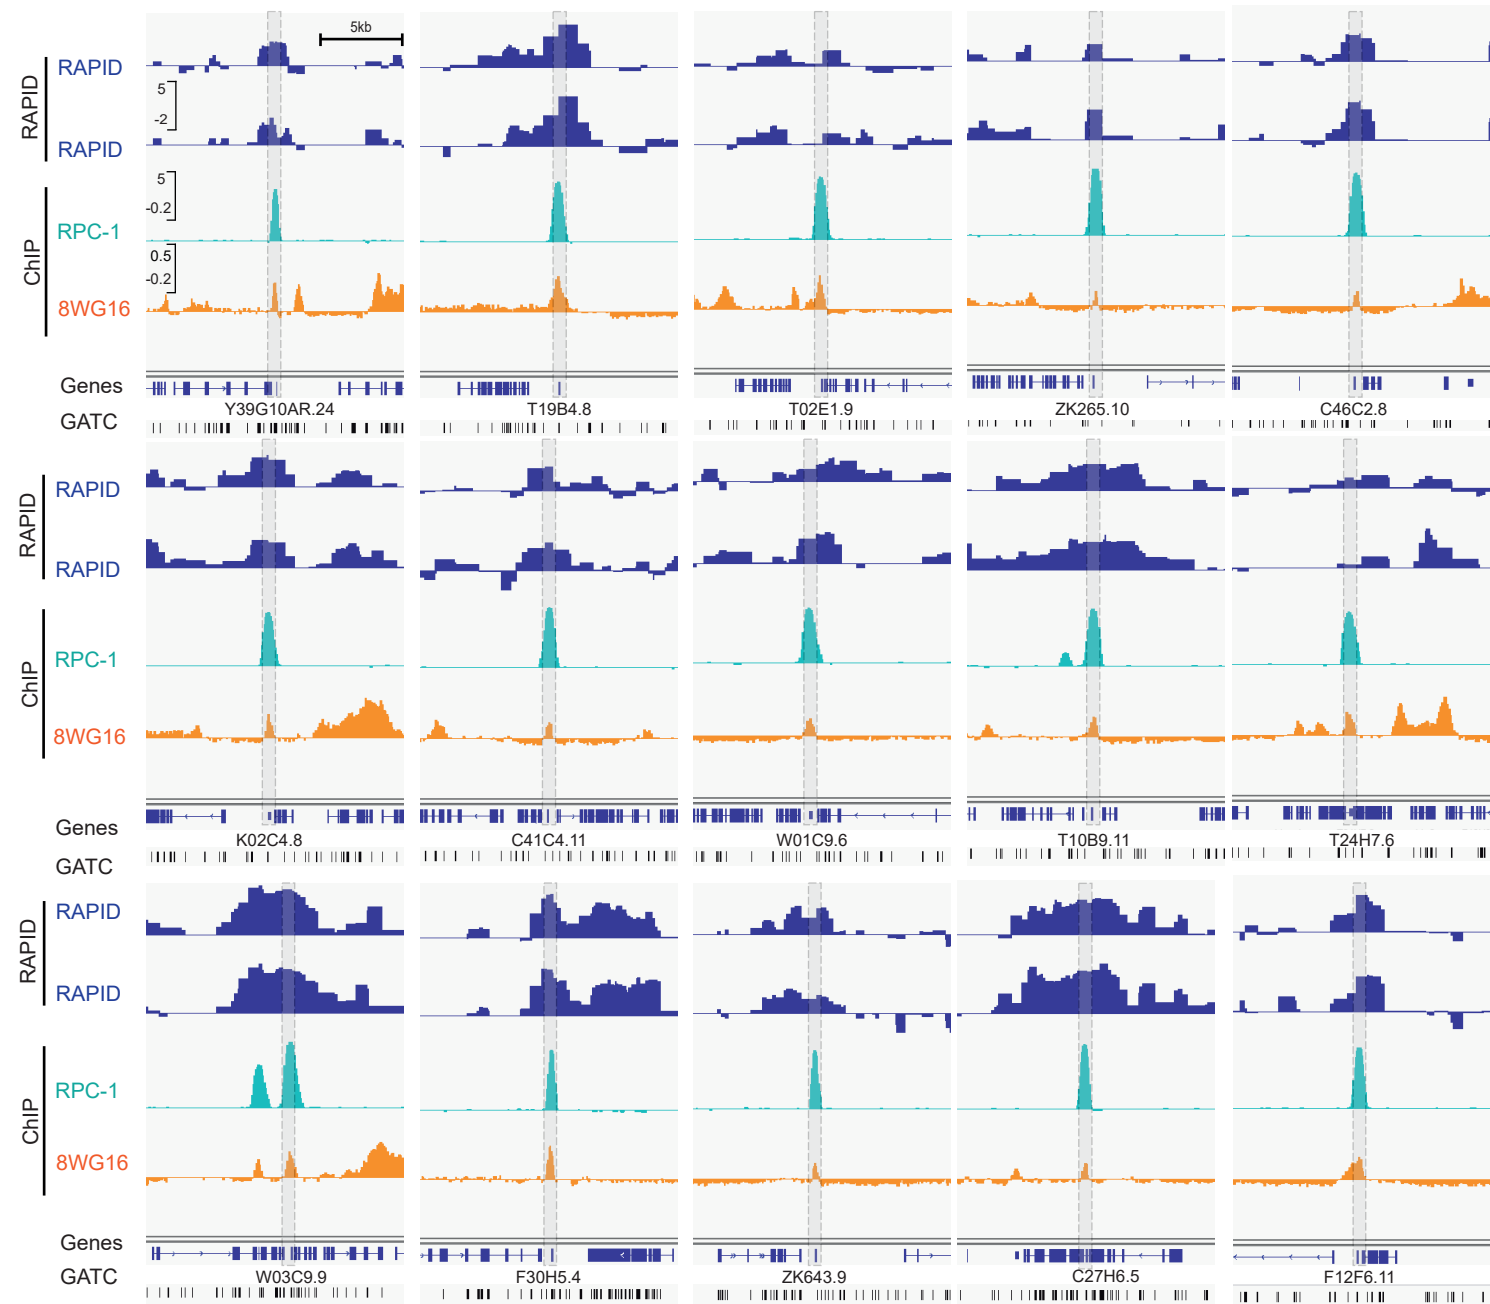

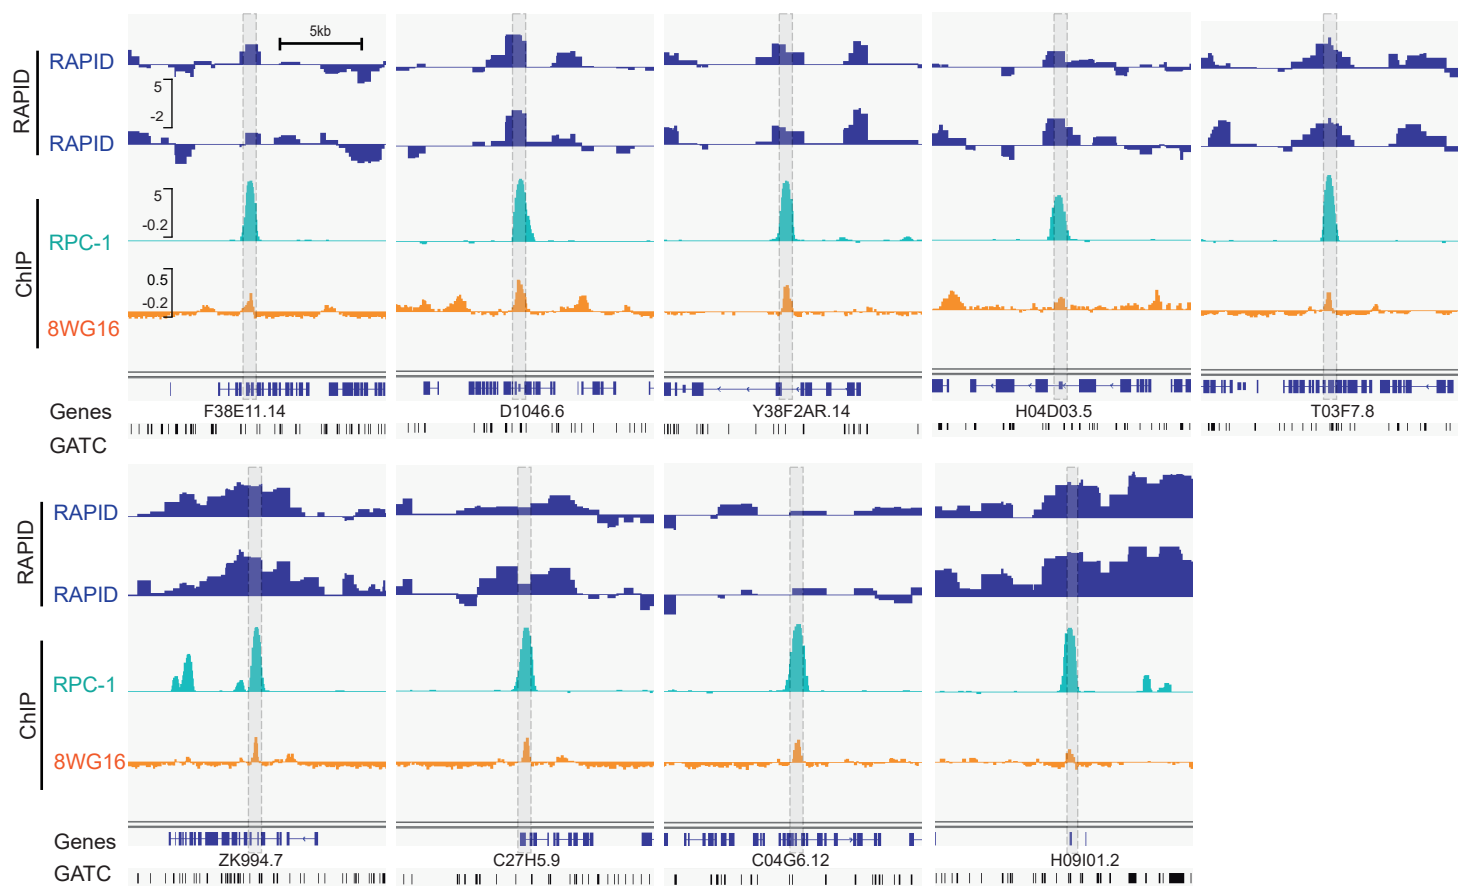

**C** RAPID signal at polIII snoRNA genes; PolII ChIP-seq overlapping (20/57)

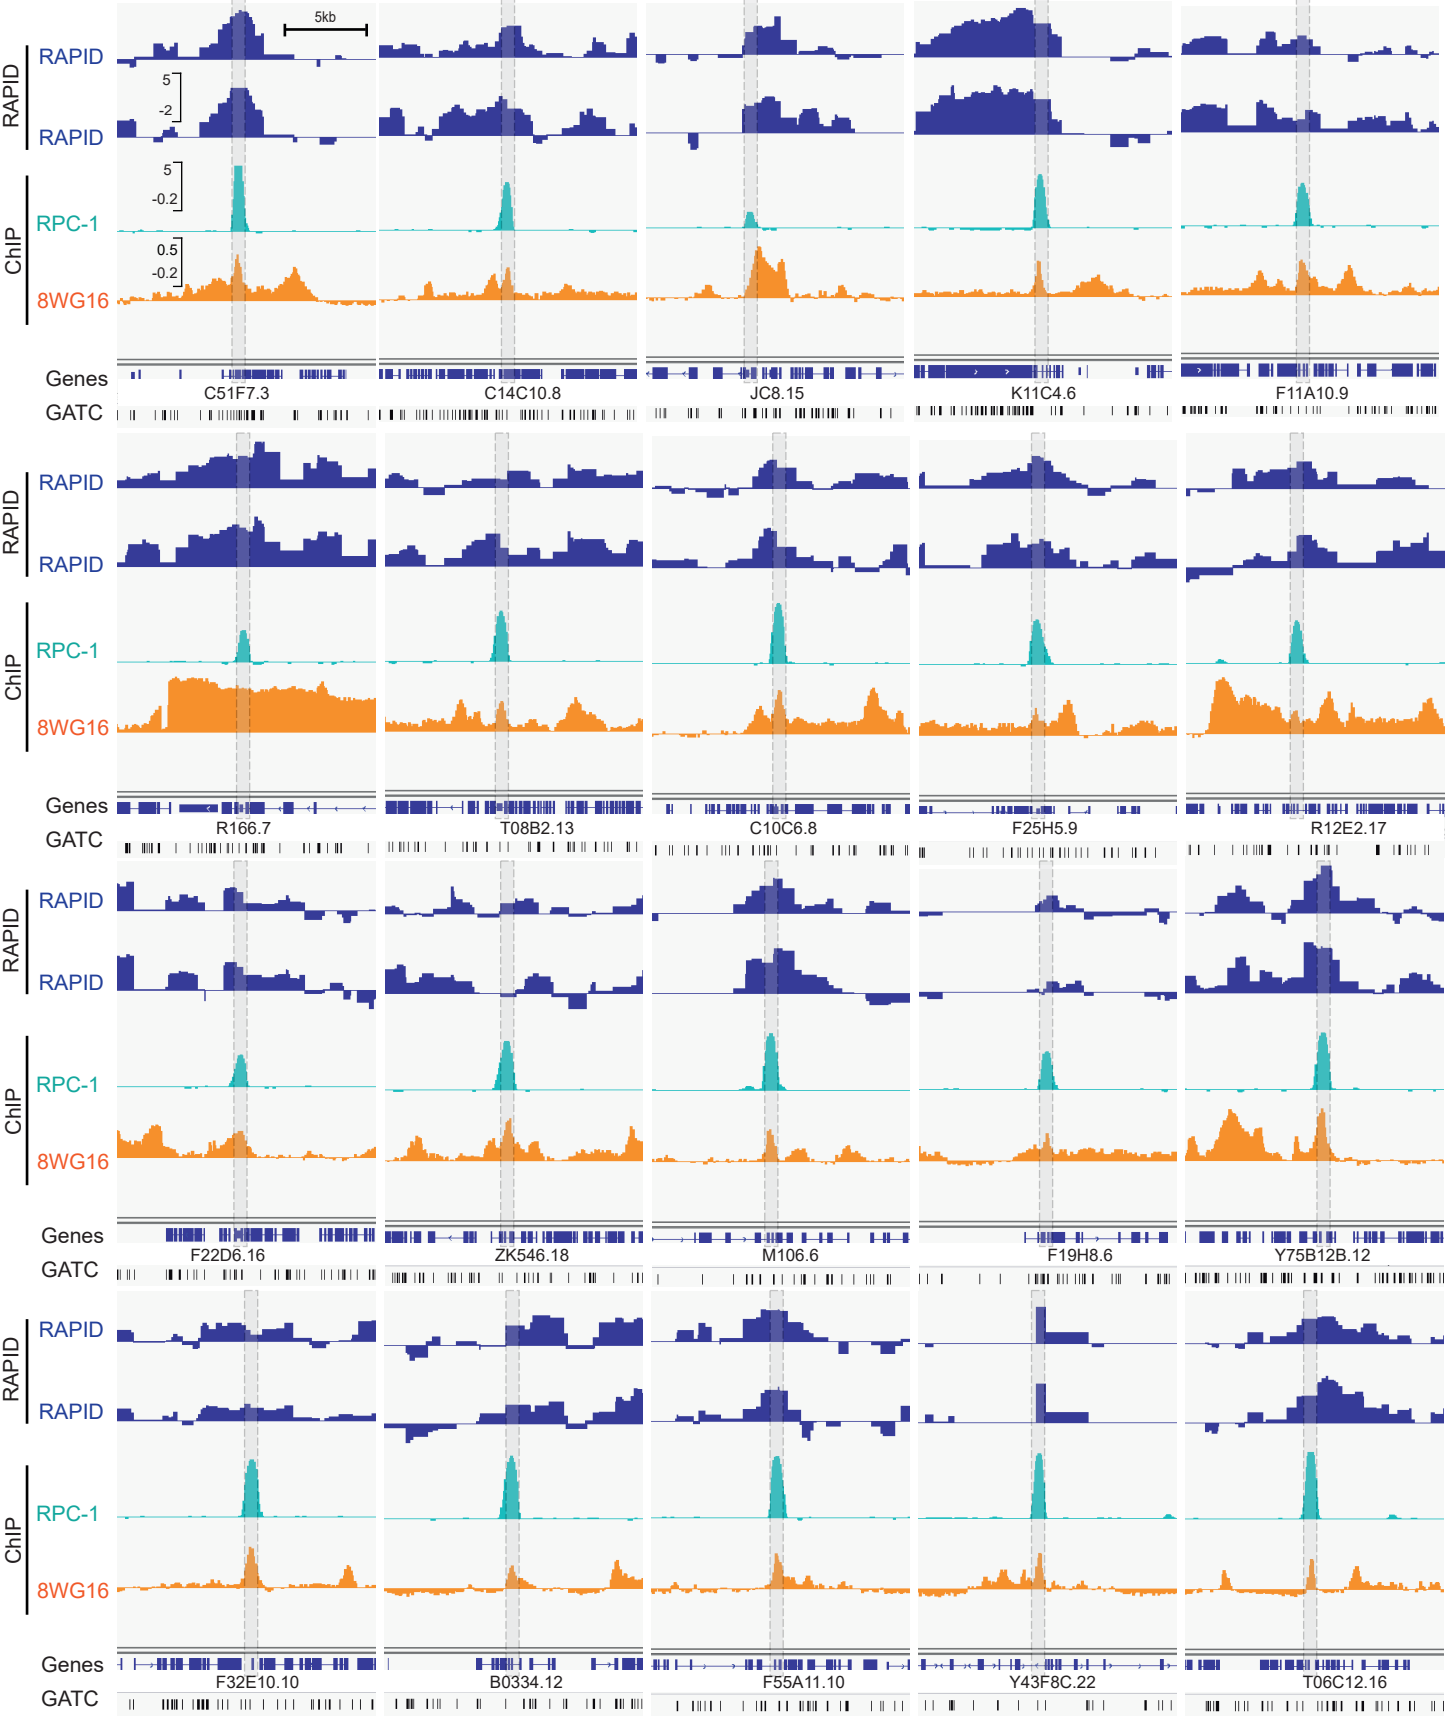

**D** No RAPID signal (13/57)

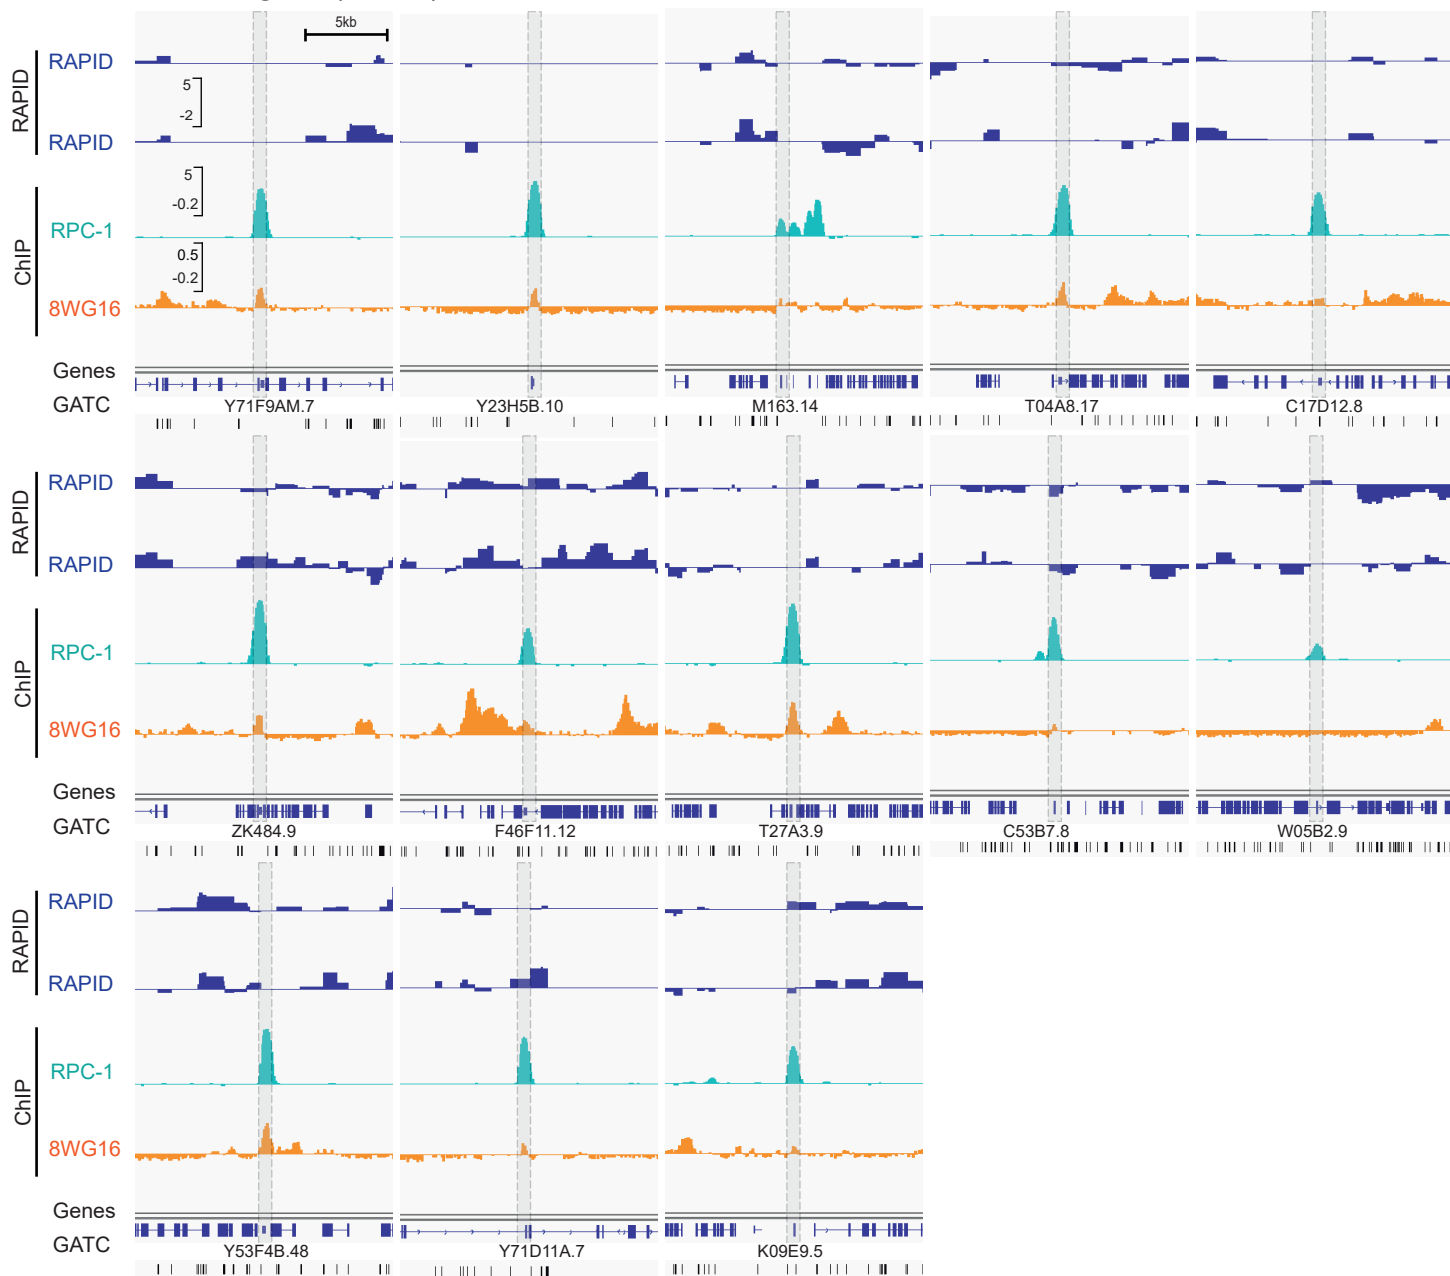

Supplement: Supplementary file 10 [file 1]
