# Supplementary material
Source: publisher figshare collection journal article supplement (https://gsajournals.figshare.com/articles/dataset/_/13072355)

Figure S4

**A**

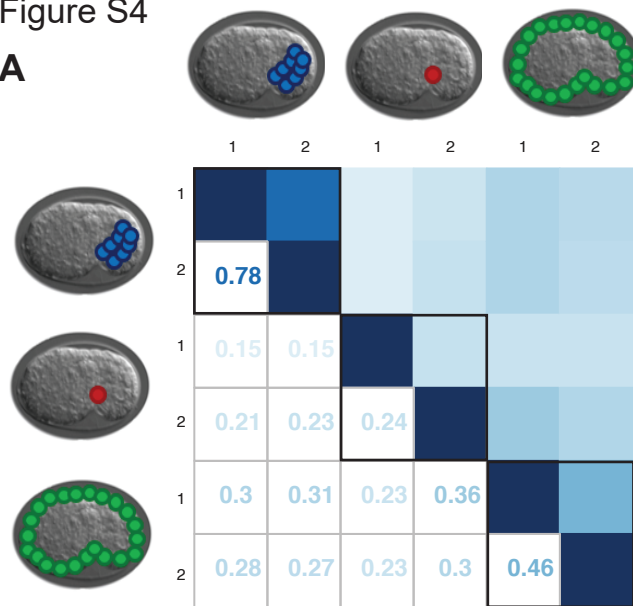

**B**

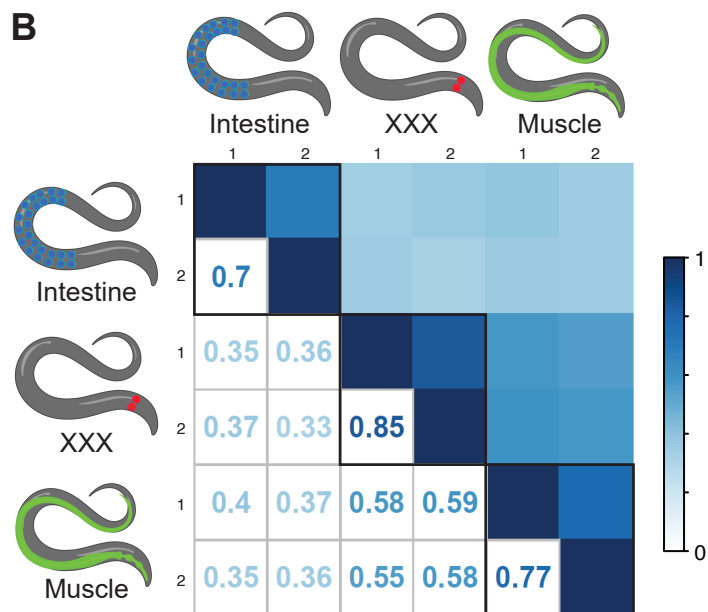

Supplement: Supplementary file 1 [file 1]

Figure S3

**A** Tissue-specific sorted cells and Dam expression

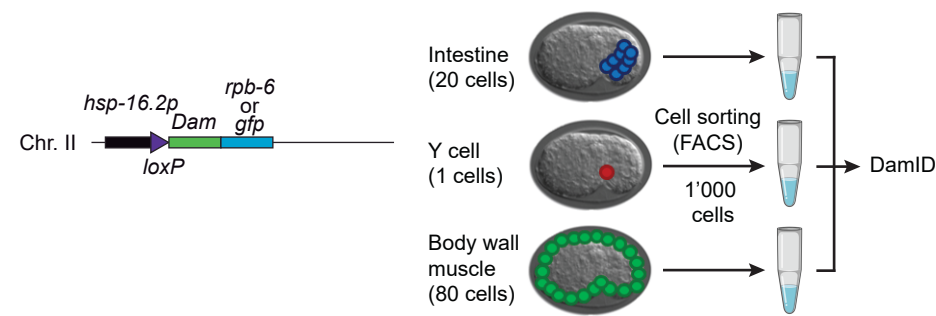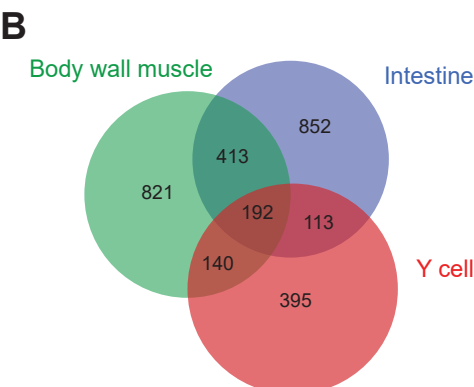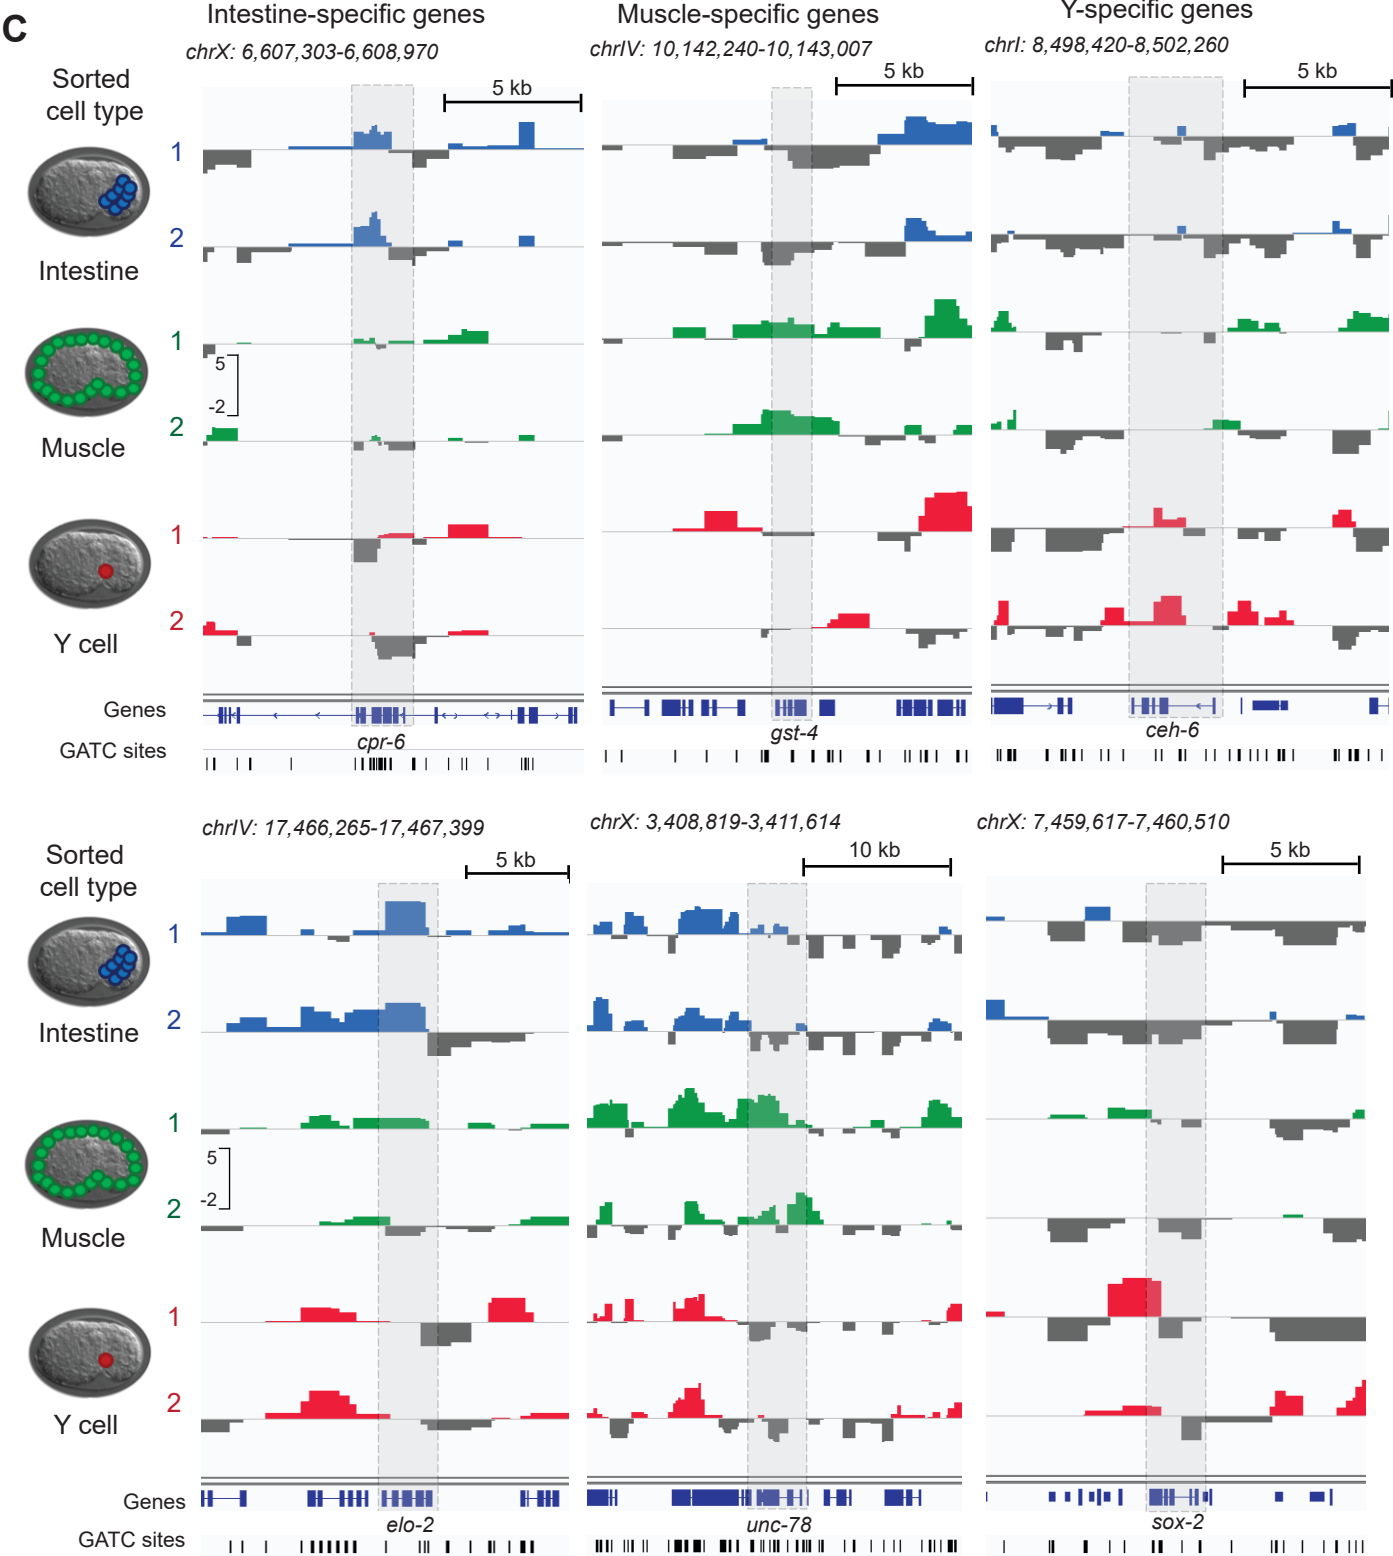

**D**

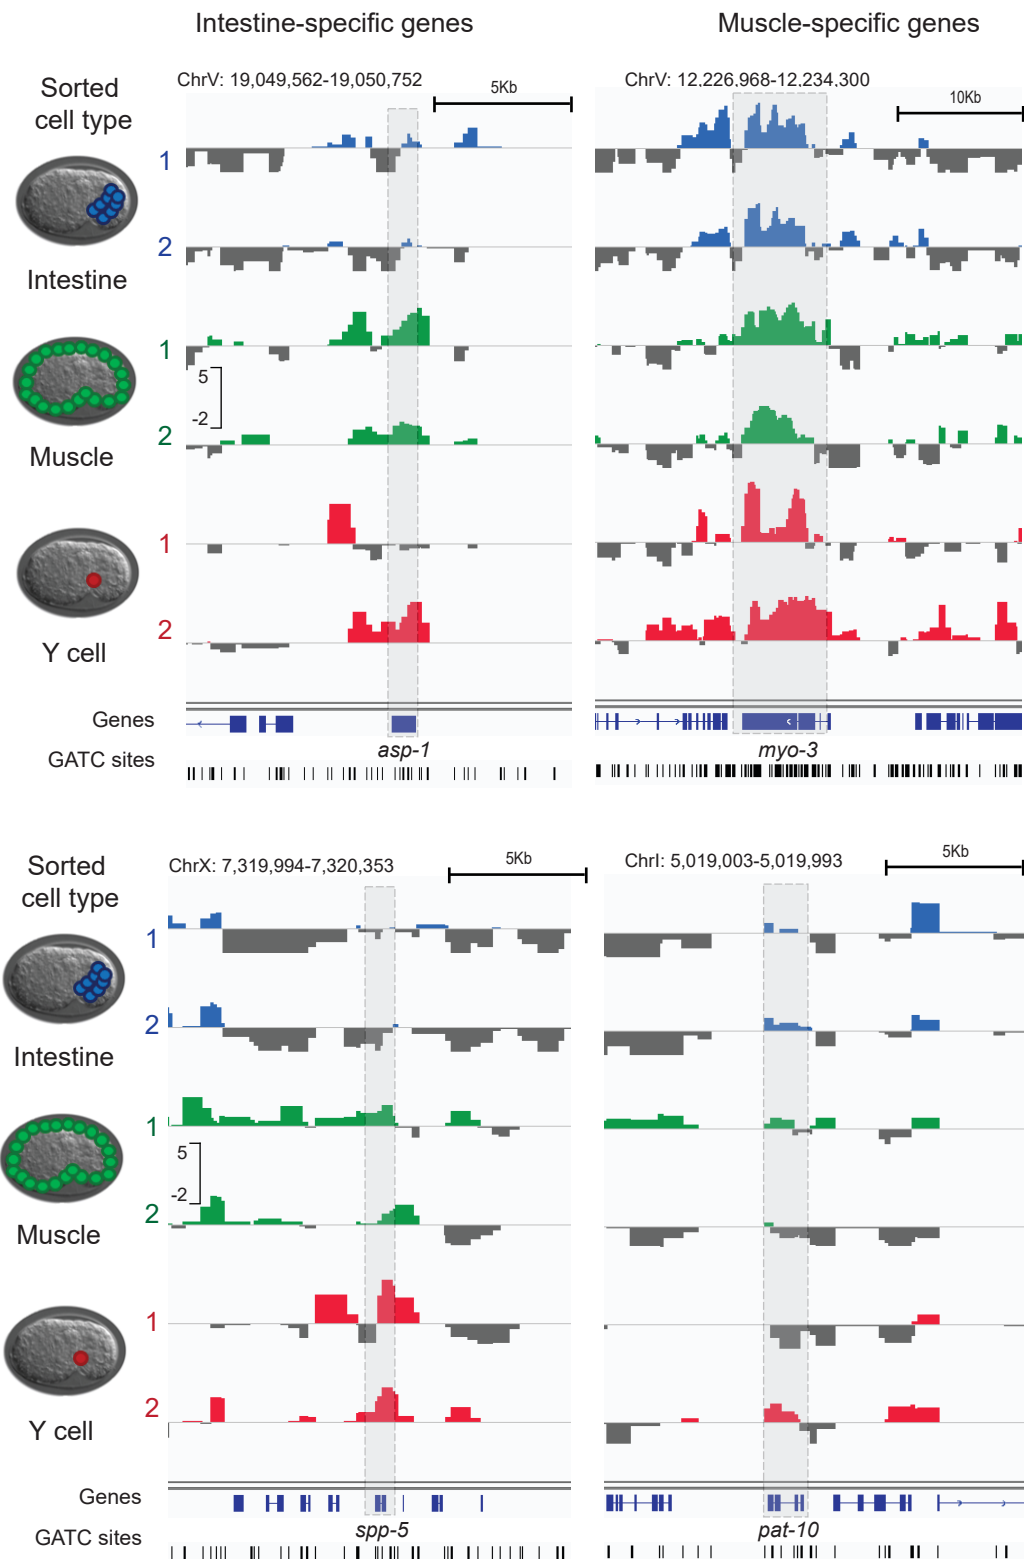

Supplement: Supplementary file 2 [file 1]

Figure S8

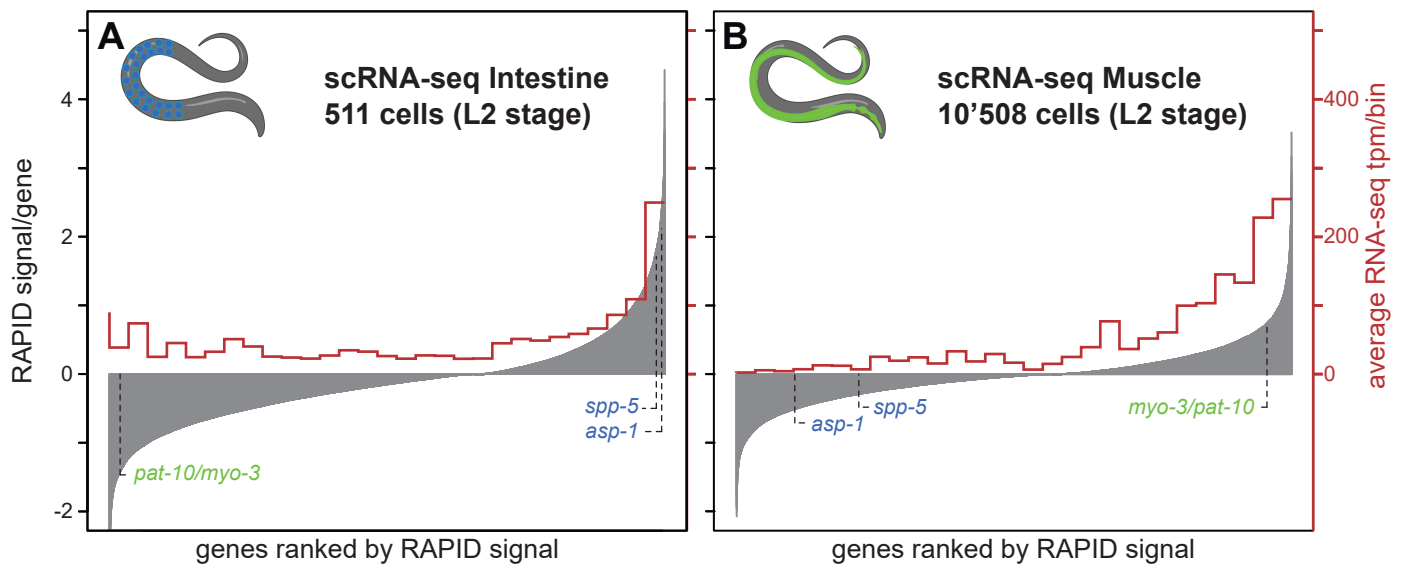

Supplement: Supplementary file 4 [file 1]

Figure S9

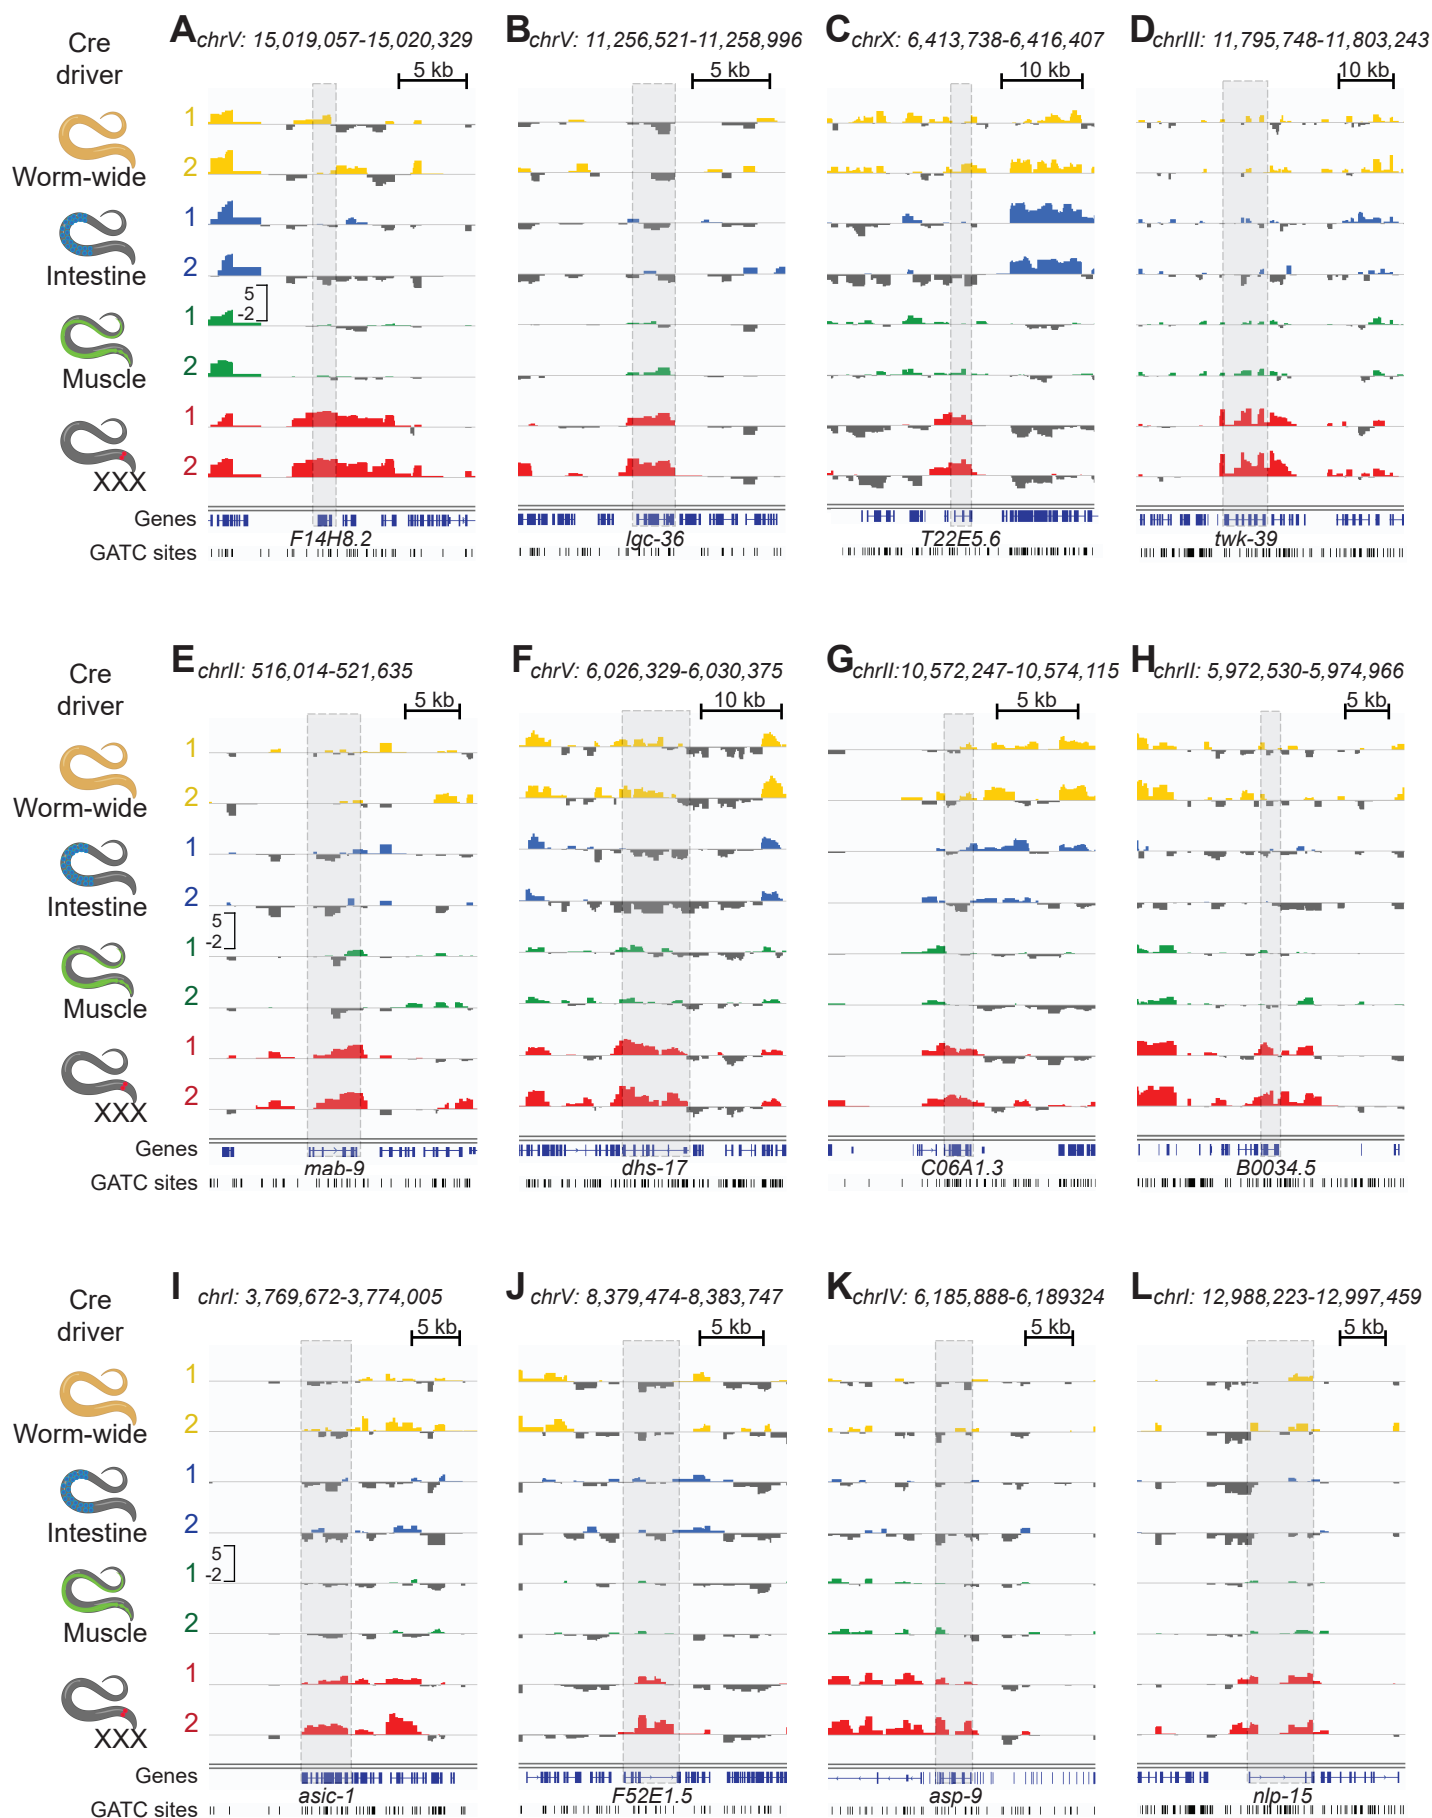

Supplement: Supplementary file 5 [file 1]

Muscle comparison

Figure S6

A RAPID vs FACS

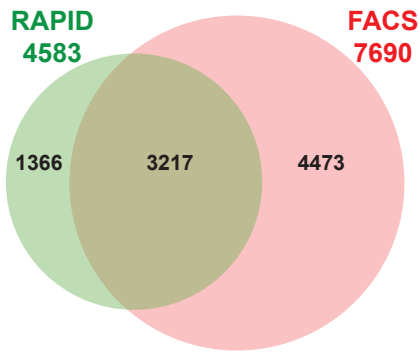

B RAPID vs PAT-Seq

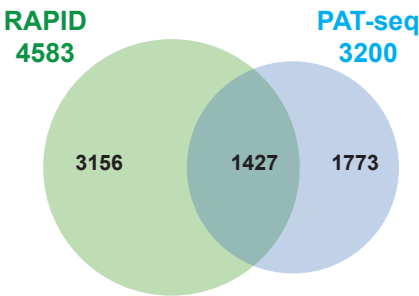

C FACS vs PAT-Seq

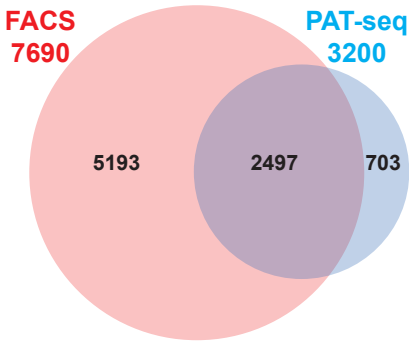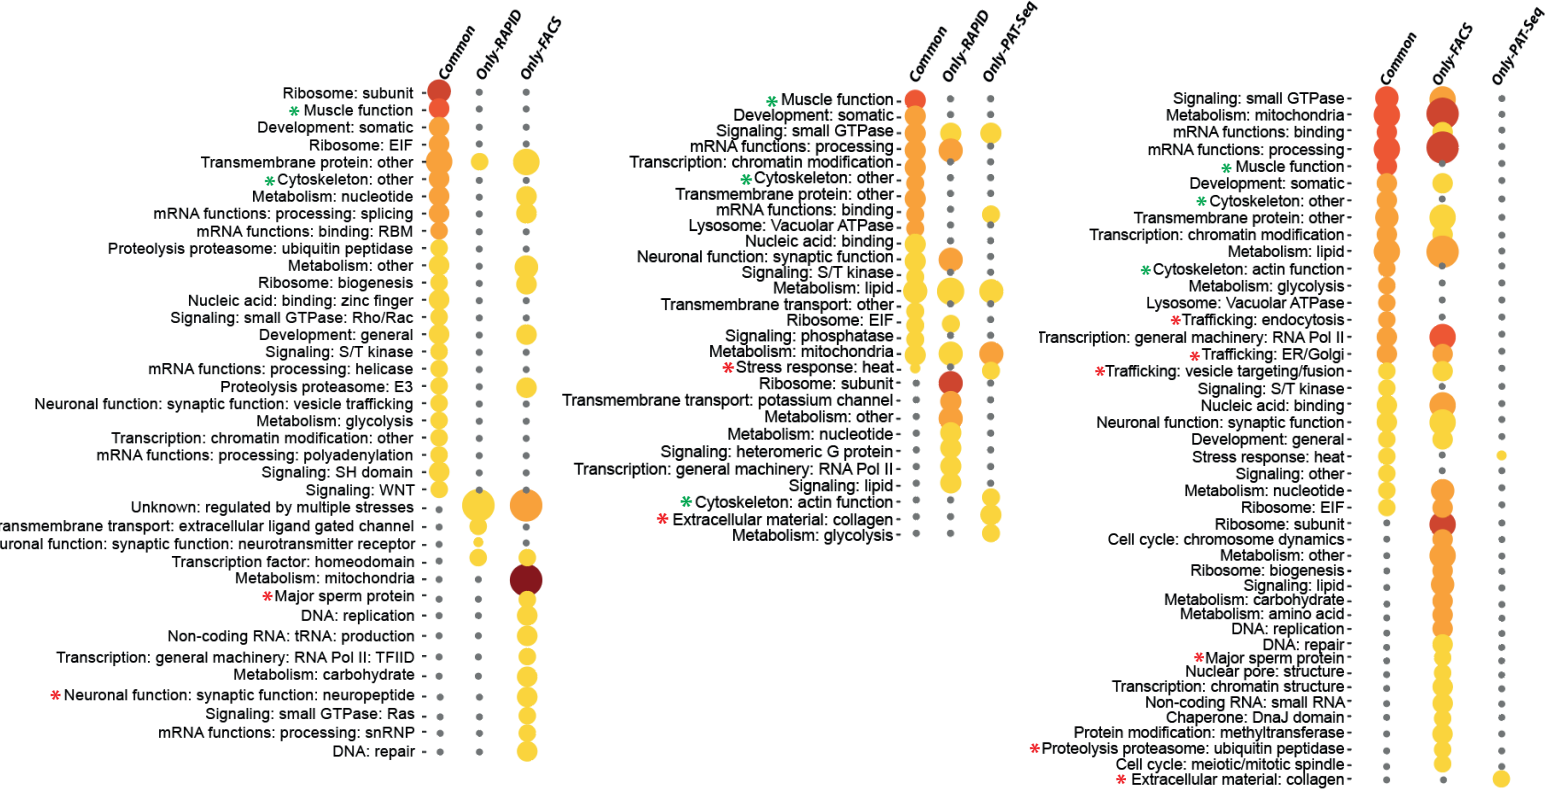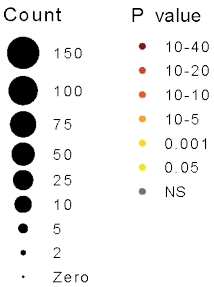

Supplement: Supplementary file 6 [file 1]

Figure S10

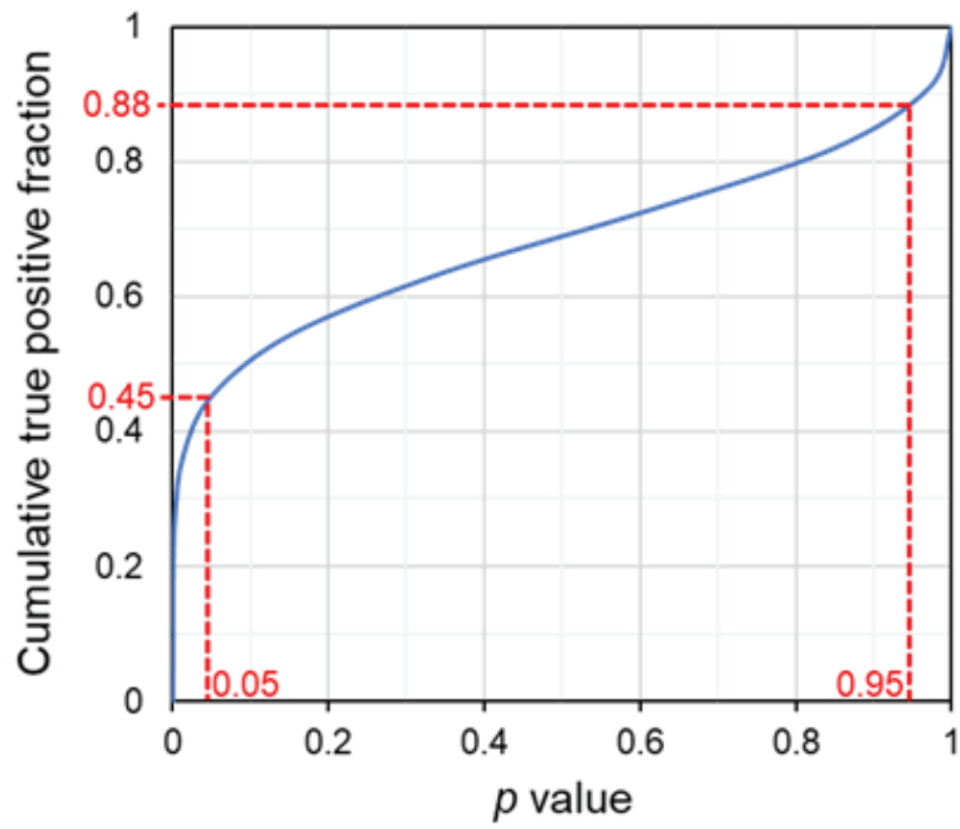

Supplement: Supplementary file 8 [file 1]

# Intestine comparison

Figure S7

## A RAPID vs FACS

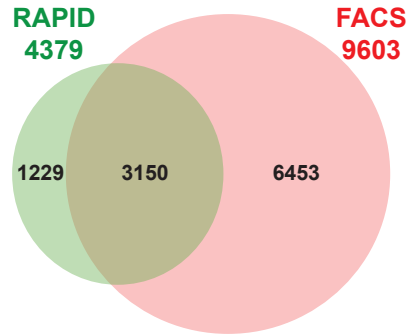

## B RAPID vs PAT-Seq

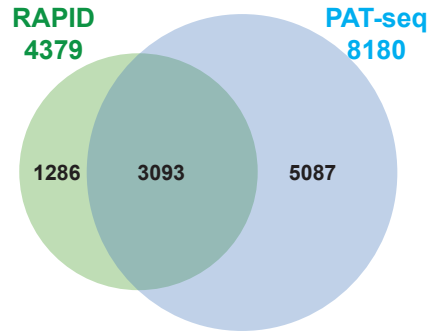

## C FACS vs PAT-Seq

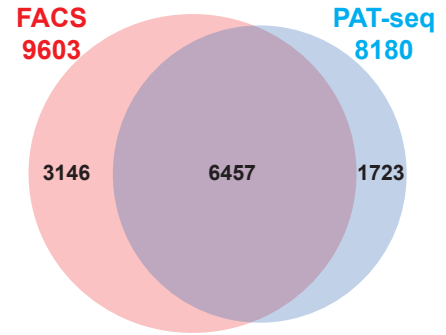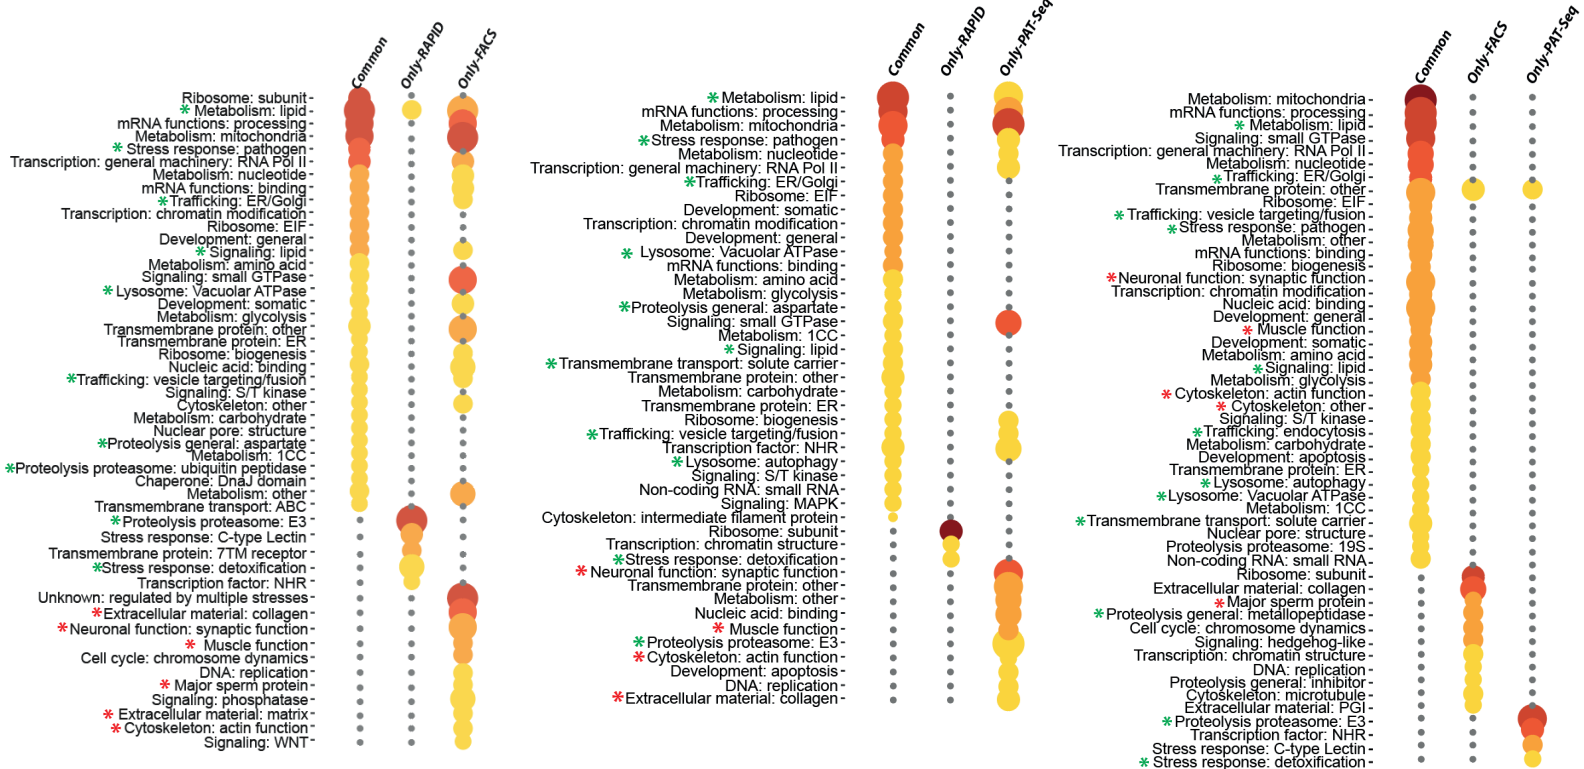

Supplement: Supplementary file 9 [file 1]

Figure S1

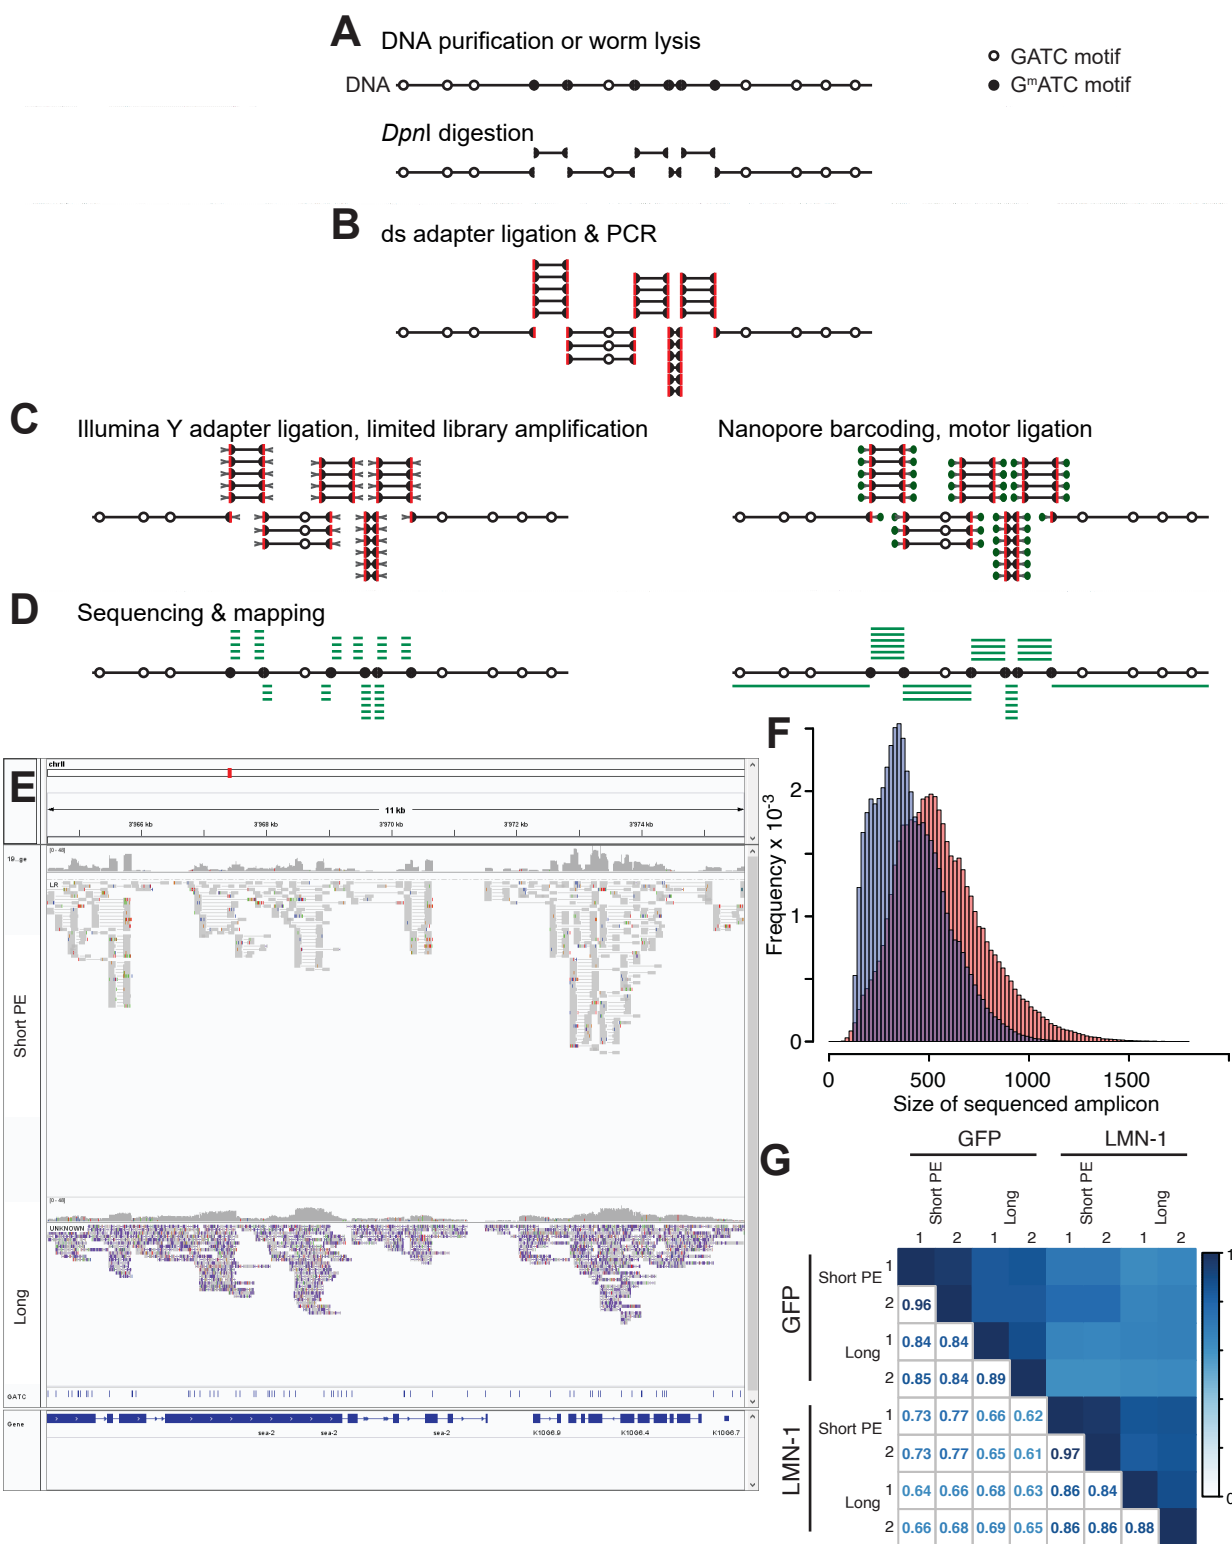

Supplement: Supplementary file 11 [file 1]
